# Supplementary material
Source: PubMed Central journal article supplement (PMC3793604)
Supplement: supp_M037861_jlr.M037861-1.pdf [file supp_M037861_jlr.M037861-1.pdf]

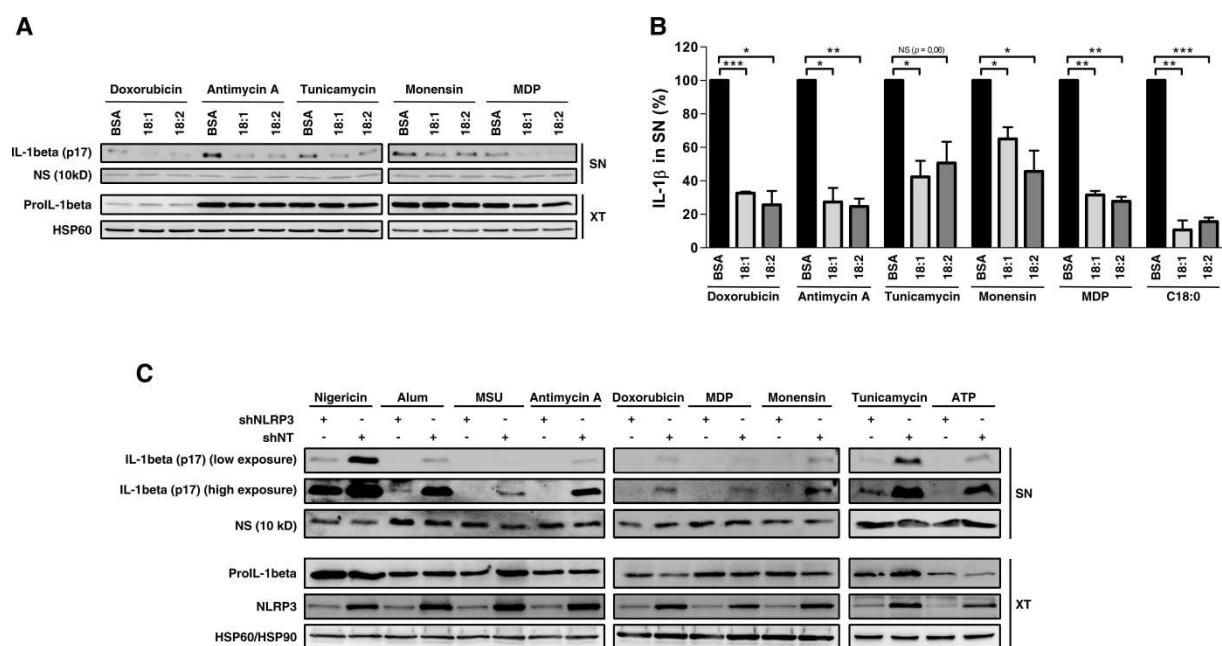

**Figure S1. UFAs inhibit NLRP3 activation by non-classical inducers in PMA-differentiated THP-1 cells**

(A) IL-1 $\beta$  release in supernatants (SN) from PMA-differentiated THP-1 cells determined by immunoblotting after co-treatment with various NLRP3 inducers and 200  $\mu$ M of UFAs or BSA. Cells were treated with doxorubicin (20  $\mu$ M), antimycin A (25  $\mu$ g/mL), tunicamycin (10  $\mu$ g/mL), monensin (50  $\mu$ M) or MDP (100  $\mu$ g/mL) for 8 h. (B) Quantification of IL-1 $\beta$  in SN from A. Results are presented as means  $\pm$  SEM of at least three independent experiments. (C) IL-1 $\beta$  release in SN from PMA-differentiated THP-1 cells stably expressing shRNA against NLRP3 (shNLRP3) or a non-target shRNA (shNT) determined by immunoblotting after 8 h of treatment with either nigericin (5  $\mu$ M), alum (400  $\mu$ g/mL), MSU (100  $\mu$ g/mL), antimycin A (25  $\mu$ g/mL), doxorubicin (20  $\mu$ M), MDP (100  $\mu$ g/mL), monensin (50  $\mu$ M), tunicamycin (10  $\mu$ g/mL) or ATP (10 mM). NLRP3 was blotted as a control for shRNA. A non-specific band (NS) at 10 kDa was used as loading control in supernatants. HSP60 or HSP90 were blotted as a loading control in cell extracts. \*  $p < 0.05$ ; \*\*  $p < 0.01$ ; \*\*\*  $p < 0.001$ ; NS, non significant by  $t$ -test. XT, cell extract.
